# Supplementary material for: Multidimensional Transition Metal Complexes Based on 3-Amino-1H-1,2,4-triazole-5-carboxylic Acid: From Discrete Mononuclear Complexes to Layered Materials
Source: MDPI journal article supplement (doi:10.3390/molecules200712341), 2015-07-07
Supplement: s1 [file s1]

## checkCIF (full publication check) running

## checkCIF/PLATON (full publication check)

Structure factors have been supplied for datablock(s) I

THIS REPORT IS FOR GUIDANCE ONLY. IF USED AS PART OF A REVIEW  
PROCEDURE FOR PUBLICATION, IT SHOULD NOT REPLACE THE EXPERTISE  
OF AN EXPERIENCED CRYSTALLOGRAPHIC REFEREE.

No syntax errors found.  
Please wait while processing ....

[CIF dictionary](#)  
[Interpreting this report](#)

[Structure factor report](#)

## Datablock: I

Bond precision: C-C = 0.0090 Å Wavelength=0.71073  
Cell: a=8.9893(13) b=8.9785(13) c=13.9642(16)  
alpha=90 beta=108.117(5) gamma=90  
Temperature: 150 K

|                | Calculated     | Reported       |
|----------------|----------------|----------------|
| Volume         | 1071.2(3)      | 1071.2(3)      |
| Space group    | P 21/n         | P 21/n         |
| Hall group     | -P 2yn         | -P 2yn         |
| Moiety formula | C6 H8 Cd N8 O5 | C6 H8 Cd N8 O5 |
| Sum formula    | C6 H8 Cd N8 O5 | C6 H8 Cd N8 O5 |
| Mr             | 384.61         | 384.60         |
| Dx,g cm-3      | 2.385          | 2.385          |
| Z              | 4              | 4              |
| Mu (mm-1)      | 2.081          | 2.081          |
| F000           | 752.0          | 752.0          |
| F000'          | 749.06         |                |
| h,k,lmax       | 10,10,16       | 10,10,16       |
| Nref           | 1886           | 1878           |
| Tmin,Tmax      | 0.905,0.939    | 0.905,0.939    |
| Tmin'          | 0.864          |                |

Correction method= # Reported T Limits: Tmin=0.905 Tmax=0.939  
AbsCorr = MULTI-SCAN  
Data completeness= 0.996 Theta(max)= 25.023  
R(reflections)= 0.0432( 1720) wR2(reflections)= 0.1150( 1878)  
S = 1.137 Npar= 205

The following ALERTS were generated. Each ALERT has the format

**test-name\_ALERT\_alert-type\_alert-level.**

Click on the hyperlinks for more details of the test.

### ●Alert level C

PLAT088\_ALERT\_3\_C Poor Data / Parameter Ratio ..... 9.16 Note  
PLAT213\_ALERT\_2\_C Atom O2 has ADP max/min Ratio ..... 3.2 oblate  
PLAT342\_ALERT\_3\_C Low Bond Precision on C-C Bonds ..... 0.0090 Ang.  
PLAT790\_ALERT\_4\_C Centre of Gravity not Within Unit Cell: Resd. # 1 Note  
C6 H8 Cd N8 O5  
PLAT906\_ALERT\_3\_C Large K value in the Analysis of Variance ..... 3.147 Check  
PLAT911\_ALERT\_3\_C Missing # FCF Refl Between THmin & STh/L= 0.595 6 Report

### ●Alert level G

PLAT002\_ALERT\_2\_G Number of Distance or Angle Restraints on AtSite 13 Note  
PLAT003\_ALERT\_2\_G Number of Uiso or Uij Restrained non-H Atoms ... 1 Report  
PLAT004\_ALERT\_5\_G Polymeric Structure Found with Maximum Dimension 1 Info  
PLAT066\_ALERT\_1\_G Predicted and Reported Tmin&Tmax Range Identical ? Check  
PLAT083\_ALERT\_2\_G SHELXL Second Parameter in WGHT Unusually Large. 11.82 Why ?  
PLAT172\_ALERT\_4\_G The CIF-Embedded .res File Contains DFIX Records 5 Report

|                   |                                                  |    |        |
|-------------------|--------------------------------------------------|----|--------|
| PLAT720_ALERT_4_G | Number of Unusual/Non-Standard Labels .....      | 2  | Note   |
| PLAT860_ALERT_3_G | Number of Least-Squares Restraints .....         | 15 | Note   |
| PLAT909_ALERT_3_G | Percentage of Observed Data at Theta(Max) still  | 73 | %      |
| PLAT910_ALERT_3_G | Missing # of FCF Reflection(s) Below Th(Min) ... | 2  | Report |

- 0 **ALERT level A** = Most likely a serious problem - resolve or explain  
0 **ALERT level B** = A potentially serious problem, consider carefully  
6 **ALERT level C** = Check. Ensure it is not caused by an omission or oversight  
10 **ALERT level G** = General information/check it is not something unexpected

- 1 ALERT type 1 CIF construction/syntax error, inconsistent or missing data  
4 ALERT type 2 Indicator that the structure model may be wrong or deficient  
7 ALERT type 3 Indicator that the structure quality may be low  
3 ALERT type 4 Improvement, methodology, query or suggestion  
1 ALERT type 5 Informative message, check

## checkCIF publication errors

### Alert level A

- PUBL004\_ALERT\_1\_A The contact author's name and address are missing, \_publ\_contact\_author\_name and \_publ\_contact\_author\_address.  
PUBL005\_ALERT\_1\_A \_publ\_contact\_author\_email, \_publ\_contact\_author\_fax and \_publ\_contact\_author\_phone are all missing.  
At least one of these should be present.  
PUBL006\_ALERT\_1\_A \_publ\_requested\_journal is missing  
e.g. 'Acta Crystallographica Section C'  
PUBL008\_ALERT\_1\_A \_publ\_section\_title is missing. Title of paper.  
PUBL009\_ALERT\_1\_A \_publ\_author\_name is missing. List of author(s) name(s).  
PUBL010\_ALERT\_1\_A \_publ\_author\_address is missing. Author(s) address(es).  
PUBL012\_ALERT\_1\_A \_publ\_section\_abstract is missing.  
Abstract of paper in English.

### Alert level G

- PUBL017\_ALERT\_1\_G The \_publ\_section\_references section is missing or empty.

- 7 **ALERT level A** = Data missing that is essential or data in wrong format  
1 **ALERT level G** = General alerts. Data that may be required is missing

### Publication of your CIF

You should attempt to resolve as many as possible of the alerts in all categories. Often the minor alerts point to easily fixed oversights, errors and omissions in your CIF or refinement strategy, so attention to these fine details can be worthwhile. In order to resolve some of the more serious problems it may be necessary to carry out additional measurements or structure refinements. However, the nature of your study may justify the reported deviations from journal submission requirements and the more serious of these should be commented upon in the discussion or experimental section of a paper or in the "special\_details" fields of the CIF. *checkCIF* was carefully designed to identify outliers and unusual parameters, but every test has its limitations and alerts that are not important in a particular case may appear. Conversely, the absence of alerts does not guarantee there are no aspects of the results needing attention. It is up to the individual to critically assess their own results and, if necessary, seek expert advice.

If level A alerts remain, which you believe to be justified deviations, and you intend to submit this CIF for publication in a journal, you should additionally insert an explanation in your CIF using the Validation Reply Form (VRF) below. This will allow your explanation to be considered as part of the review process.

### Validation response form

Please find below a validation response form (VRF) that can be filled in and pasted into your CIF.

```
# start Validation Reply Form
_vrf_PUBL004_GLOBAL
;
PROBLEM: The contact author's name and address are missing,
RESPONSE: ...
;
_vrf_PUBL005_GLOBAL
;
PROBLEM: _publ_contact_author_email, _publ_contact_author_fax and
RESPONSE: ...
;
_vrf_PUBL006_GLOBAL
;
```

PROBLEM: \_publ\_requested\_journal is missing  
 RESPONSE: ...  
 ;  
 \_vrf\_PUBL008\_GLOBAL  
 ;  
 PROBLEM: \_publ\_section\_title is missing. Title of paper.  
 RESPONSE: ...  
 ;  
 \_vrf\_PUBL009\_GLOBAL  
 ;  
 PROBLEM: \_publ\_author\_name is missing. List of author(s) name(s).  
 RESPONSE: ...  
 ;  
 \_vrf\_PUBL010\_GLOBAL  
 ;  
 PROBLEM: \_publ\_author\_address is missing. Author(s) address(es).  
 RESPONSE: ...  
 ;  
 \_vrf\_PUBL012\_GLOBAL  
 ;  
 PROBLEM: \_publ\_section\_abstract is missing.  
 RESPONSE: ...  
 ;  
 # end Validation Reply Form

If you wish to submit your CIF for publication in Acta Crystallographica Section C or E, you should upload your CIF via [the web](#). If your CIF is to form part of a submission to another IUCr journal, you will be asked, either during electronic [submission](#) or by the Co-editor handling your paper, to upload your CIF via our web site.

PLATON version of 21/06/2015; check.def file version of 21/06/2015

## Datablock I - ellipsoid plot

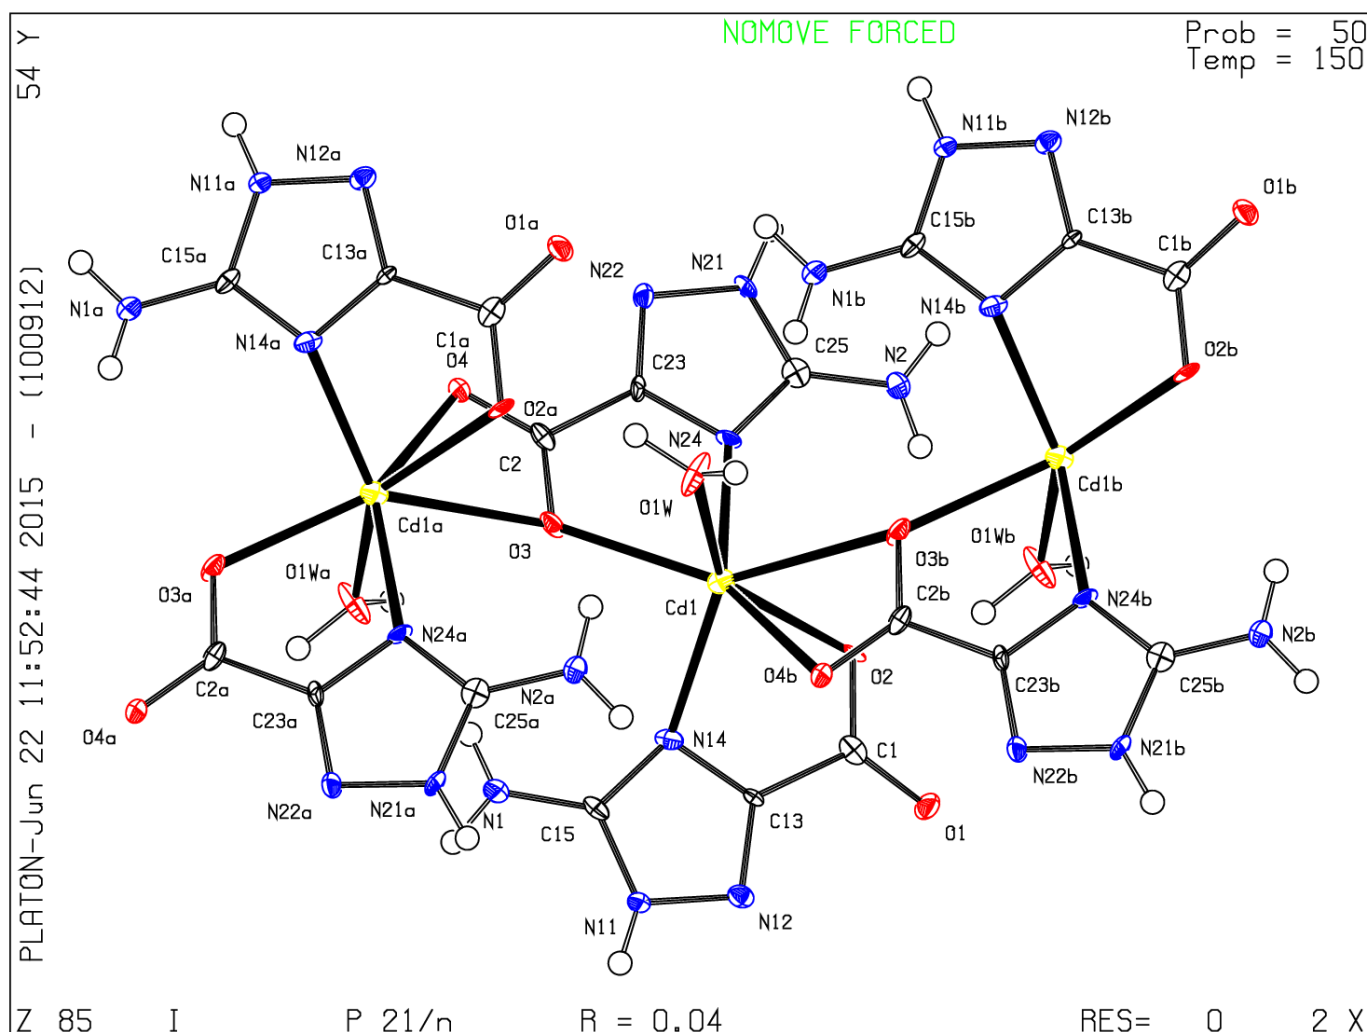

[Download CIF editor \(enCIFer\) from the CCDC](#)  
[Test a new CIF entry](#)
